# Supplementary material for: The embryonic life history of the tropical sea hare Stylocheilus striatus (Gastropoda: Opisthobranchia) under ambient and elevated ocean temperatures
Source: PeerJ. 2017 Feb 1;5:e2956. doi: 10.7717/peerj.2956 (PMC5291104; doi:10.7717/peerj.2956)
Supplement: Data S1 [file peerj-05-2956-s001.xlsx]

## Sheet: Broodstock, etc.
Broodstock characteristics, reproductive behavior and oviposition
Individual No.	Broodstock length (cm)		Mating pair No.	Copulatoty duration (min)		Individual No.	Time to oviposition (h)		Individual No.	Duration of oviposition (min)
1	6.2		1	60		1	8		1	9
2	6.6		2	45		2	9		2	5
3	5.3		3	45		3	9		3	10
4	6.7		4	40		4	16		4	15
5	5.1		5	15		5	16		5	10
6	6					6	8.5
7	5.5		Avg	41		7	9.5		Avg	9.8
8	6.3		StDev	16.3554		8	5		StDev	3.56371
9	5.4					9	6
10	4.7					10	7
11	4.5					11	8
12	5					12	8.5
Avg	5.60833					Avg	9.20833
StDev	0.737882					StDev	3.42755

## Sheet: Reciprocal mating
Reciprocal mating
Mating pair	Yes/No
1	No
2	Yes
3	No
4	No
5	Yes
6	No
7	No
8	Yes
9	Yes
10	Yes
11	No
12	No
13	No
14	Yes
15	Yes
16	No
17	Yes
18	No
19	Yes	Summary
20	No	No=11
21	No	Yes=10
% Reciprocal Mating	47.619

## Sheet: Egg mass characteristics
Egg mass characteristics
Egg ribbon No.	Egg ribbon length (mm)		Egg ribbon No.	No. of embryos/mm2 egg ribbon			No. embryos/egg capsule													Diameter of uncleaved embryo (micron)
1	21.2		1	87		Egg ribbon No.											Avg		Egg ribbon No.											Avg
2	28.4		2	91		1	2	2	3	2	3	2	2	2	2	3	2.3		1	55.8	60	58.8	61.2	57	58.2	66	60	60	54.6	59.16
3	12.3		3	101		2	3	2	2	2	3	2	2	2	2	2	2.2		2	57	55.2	60.6	58.8	61.2	54.6	61.8	63.6	60.6	63	59.64
4	20.4		4	81		3	3	3	3	3	3	4	3	3	3	3	3.1		3	64.2	63.6	57.6	63	56.4	60	63	63.6	63.6	64.2	61.92
5	22		5	114		4	2	3	2	2	2	2	2	2	2	2	2.1		4	63.6	61.4	59.6	60.8	58.5	59.1	64.7	62.6	62.1	57.7	61.01
6	24.2		6	108		5	3	2	3	2	3	3	2	3	3	3	2.7		5	61.3	58.2	61.2	63.7	62.2	59.6	62.2	62.5	61.8	64.6	61.73
7	30		7	89		6	4	3	3	4	3	2	3	2	3	5	3.2		6	59.6	62.4	58.8	65.2	58.5	60.8	63.1	63.7	61.2	64.4	61.77
8	17.3		8	126		7	2	3	3	3	2	4	3	3	3	2	2.8		7	59.4	60.6	63.7	62.4	59.7	58.4	64.2	61.3	59.3	56.9	60.59
9	18		9	84		8	3	4	3	3	4	3	3	4	3	3	3.3		8	60.6	55.4	62.8	59.7	63	57.9	61.3	62.8	64.1	62.5	61.01
10	16.5		10	113		9	3	5	4	3	3	4	3	3	4	4	3.6		9	58.5	61	61.2	60.7	59.4	61.1	60.7	60.5	61.3	63.2	60.76
11	16		11	107		10	2	2	2	2	3	2	1	2	1	2	1.9
12	11.5		12	99		11	3	4	3	3	3	4	2	2	3	3	3												Total Avg	60.8433
						12	2	2	3	1	2	2	2	2	2	2	2												StDev	2.55541
Avg	19.8167		Avg	100
StDev	5.75624		StDev	13.961												Total Avg	2.68333
																StDev	0.766782

## Sheet: Embryonic development
Embryonic development
Egg ribbon No.	1st cleavage (min)	2nd cleavage (min)	3rd cleavage (min)	Morula (min)	Blastula (min)	Gastrula (min)	Cilia movement (min)	Trocophore (min)	Pre-hatching larvae (min)	Hatching (min)
1	120	240	360	1020	1680	2520	2640	3720	4680	6720
2	180	300	420	960	1800	2640	2760	3600	4560	5880
3	240	360	420	1020	1680	2520	2760	3600	4440	6840
4	180	240	360	1020	1680	2400	2640	3240	4320	6360
5	180	300	420	960	1560	2280	2520	3240	4320	6720
6	180	240	420	960	1680	2520	2640	3480	4440	6480
7	120	240	360	960	1680	2520	2760	3480	4440	6480
8	180	300	420	1020	1560	2400	2760	3600	4560	6600
9	180	360	480	960	1680	2520	2760	3600	4560	6720
Avg (min)	173.333	286.667	406.667	986.667	1666.67	2480	2693.33	3506.67	4480	6533.33
Avg (h)	2.88889	4.77778	6.77778	16.4444	27.7778	41.3333	44.8889	58.4444	74.6667	108.889
Avg (d)	0.12037	0.199074	0.282407	0.685185	1.15741	1.72222	1.87037	2.43519	3.11111	4.53704
SD (min)	36.0555	50	40	31.6228	72.111	103.923	87.178	167.332	120	288.444
SD (h)	0.600925	0.833333	0.666667	0.527046	1.20185	1.73205	1.45297	2.78887	2	4.8074
SD (d)	0.0250386	0.0347222	0.0277778	0.0219603	0.0500771	0.0721688	0.0605403	0.116203	0.0833333	0.200308

## Sheet: Effects of temperature
Effects of temperature on key embryonic features; values are time after oviposition (h)
		Ambient temperature				Elevated temperature
Velum	Egg ribbon	Section 1	Section 2	Section 3		Section 4	Section 5	Section 6
	1	72	74	72		48	44	44
	2	60	60	60		38	38	38
	3	54	54	56		32	32	32
	4	74	74	74		28	30	30
	5	66	66	66		36	36	36
				Total Avg	65.4667			Total Avg	36.1333
				StDev	7.65195			StDev	5.7801
Statocyst	1	74	74	74		46	46	46
	2	60	60	60		38	38	38
	3	54	58	56		32	32	32
	4	76	76	76		48	46	46
	5	72	70	72		42	42	42
				Total Avg	67.4667			Total Avg	40.9333
				StDev	8.29687			StDev	5.65012
Diverticula	1	76	76	76		48	52	52
	2	84	84	84		60	60	60
	3	78	78	78		52	52	52
	4	76	76	78		50	50	50
	5	78	78	78		60	60	60
				Total Avg	78.5333			Total Avg	54.5333
				StDev	2.97289			StDev	4.74893
Operculum	1	74	74	76		48	50	50
	2	84	84	84		60	60	60
	3	78	80	80		52	52	52
	4	76	76	78		48	48	48
	5	84	84	84		54	54	54
				Total Avg	79.7333			Total Avg	52.6667
				StDev	3.99046			StDev	4.38613
Eyespots	1	96	96	96		72	72	72
	2	86	86	86		60	60	60
	3	80	82	80		54	56	56
	4	98	100	100		72	72	72
	5	84	84	86		66	66	66
				Total Avg	89.3333			Total Avg	65.0667
				StDev	7.39369			StDev	6.83966
Protoconch	1	94	96	96		70	70	70
	2	86	86	86		60	60	60
	3	84	86	86		54	54	54
	4	100	100	100		74	74	74
	5	90	90	90		72	72	72
				Total Avg	91.3333			Total Avg	66
				StDev	5.83911			StDev	7.96421
Hatching	1	124	122	122		96	96	96
	2	108	108	108		84	84	84
	3	106	106	106		78	78	78
	4	122	124	124		100	98	98
	5	114	114	116		84	84	84
				Total Avg	114.933			Total Avg	88.1333
				StDev	7.47822			StDev	8.15796

## Sheet: Veliger size
Veliger lateral shell length and width (spiral height)
	Lateral shell length (micron)				Spiral height (micron)
Egg ribbon No.	Ambient temperature	Elevated temperature			Ambient temperature	Elevated temperature
1	75.6	81			69	57.6
1	92.4	73.8			63.6	56.4
1	103.8	84			84	62.4
1	91.8	75			74.4	46.8
1	101.4	82.8			82.8	55.8
1	80.4	61.8			63.6	45
2	97.8	77.4			77.4	49.2
2	84	69			61.8	49.8
2	97.2	75			81.6	61.2
2	98.4	79.8			76.2	61.8
2	93.6	73.8			75	56.4
2	95.4	78.6			73.8	60
3	95.4	84.6			69.6	61.2
3	100.2	74.4			76.2	55.8
3	87.6	73.2			61.8	48.6
3	106.2	82.2			78	60
3	100.8	84			73.8	60
3	88.8	85.8			66	58.2
4	91.2	79.2			65.4	52.8
4	99.6	81			69	60.6
4	100.2	78			72.6	58.8
4	101.4	71.4			67.8	57.6
4	96	77.4			71.4	61.8
4	99	70.2			72	55.8
5	90	85.2			72.6	61.8
5	90.6	69.6			73.8	57
5	94.2	78			73.2	60
5	93	85.8			67.8	66
5	98.4	82.8			70.8	59.4
5	88.8	76.8			70.8	56.4
Avg	94.44	77.72			71.86	57.14
StDev	6.85302	5.82305			5.78444	5.01175
